# Supplementary material for: Microscale Self-Assembly of Upconversion Nanoparticles Driven by Block Copolymer
Source: Front Chem. 2020 Sep 16;8:836. doi: 10.3389/fchem.2020.00836 (PMC7528114; doi:10.3389/fchem.2020.00836)
Supplement: Supplementary file 1 [file Data_Sheet_1.docx]

Supplementary Material

Microscale Self-assembly of Upconversion Nanoparticles Driven by Block Copolymer

Qianqian Su1,2,#,*, Meng-Tao Zhou1,#, Ming-Zhu Zhou1, Qiang Sun3, Taotao Ai4, Yan Su5,*

1Institute of Nanochemistry and Nanobiology, Shanghai University, Shanghai 200444, China

2Department of Chemistry, National University of Singapore, Singapore 117543, Singapore

3Center for Functional Materials, NUS (Suzhou) Research Institute, Suzhou, Jiangsu 215123, China

4National and Local Joint Engineering Laboratory for Slag Comprehensive Utilization and Environmental Technology, School of Materials Science and Engineering, Shaanxi University of Technology, Hanzhong, Shaanxi 723000, China

5Genome Institute of Singapore, Agency of Science Technology and Research, 138672, Singapore

***Correspondence:** Corresponding Authors: chmsqq@shu.edu.cn (Q. Su) and suy1@gis.a-star.edu.sg (Y. Su)

#These authors contributed equally.

**
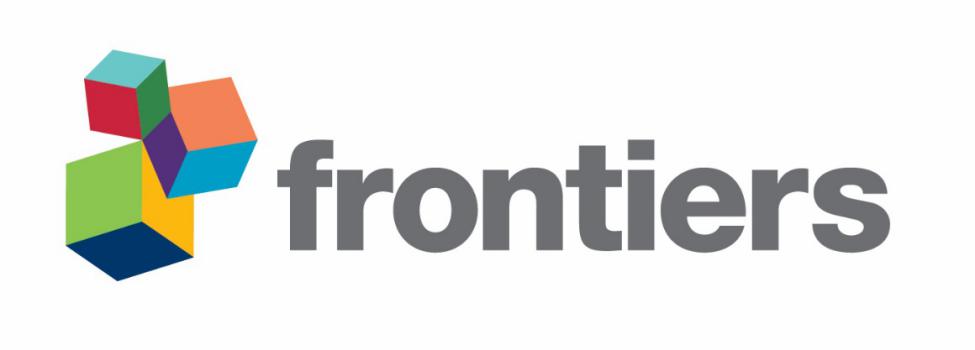
**

**
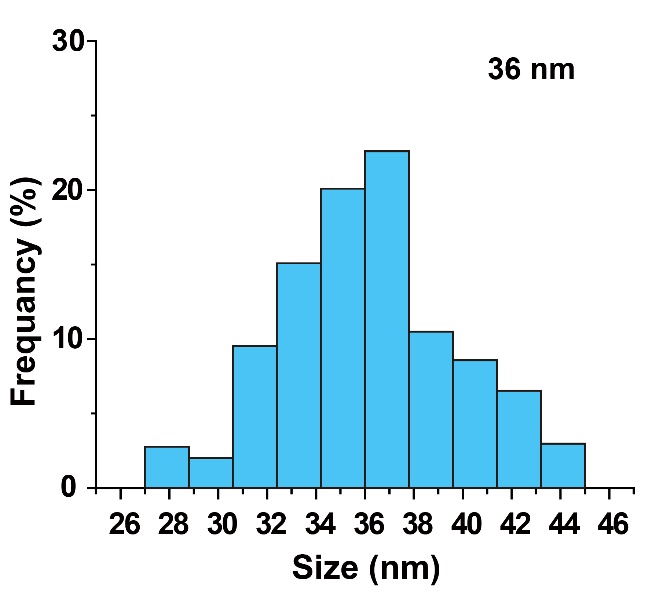
**

**Figure S1.** Size distribution of NaYF4:Yb,Tm@NaYF4 nanoparticles.


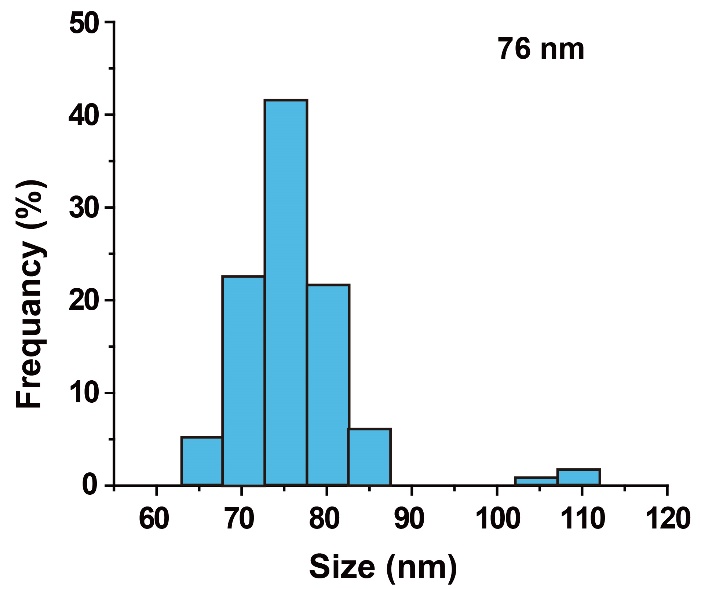


**Figure S2.** Size distribution of NaYF4:Yb,Tm@NaYF4@SiO2 (UCNPTm@SiO2) nanoparticles.


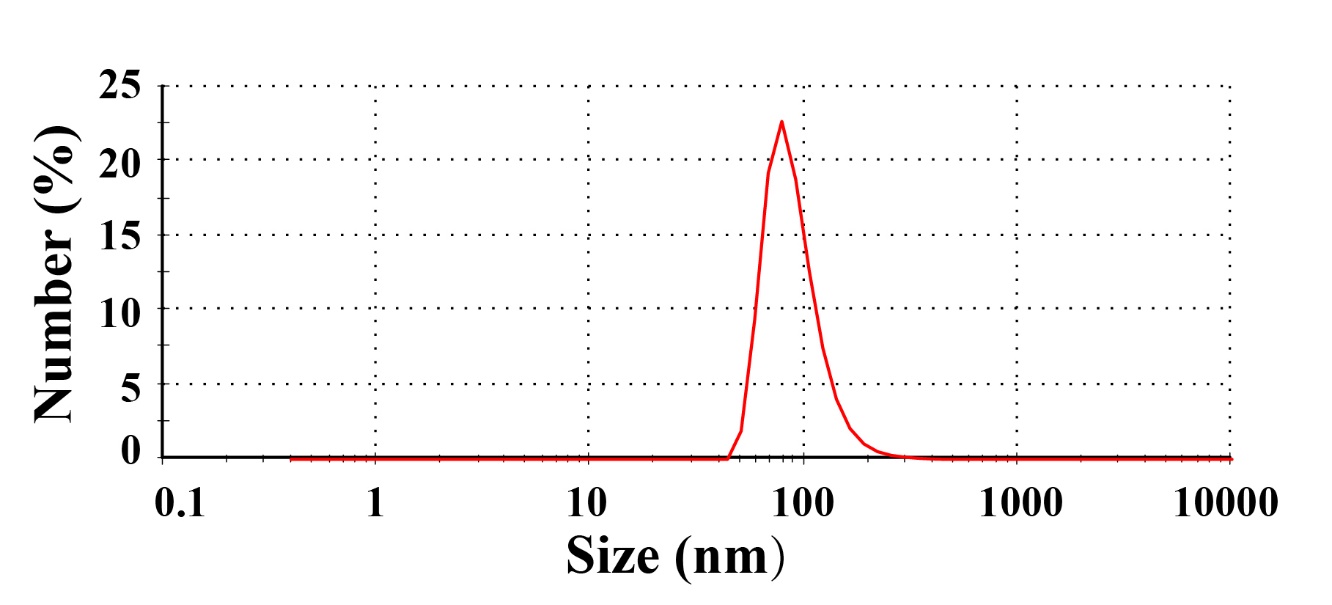


**Figure S3.** Dynamic light scattering (DLS) of UCNPTm@SiO2 nanoparticles in water.


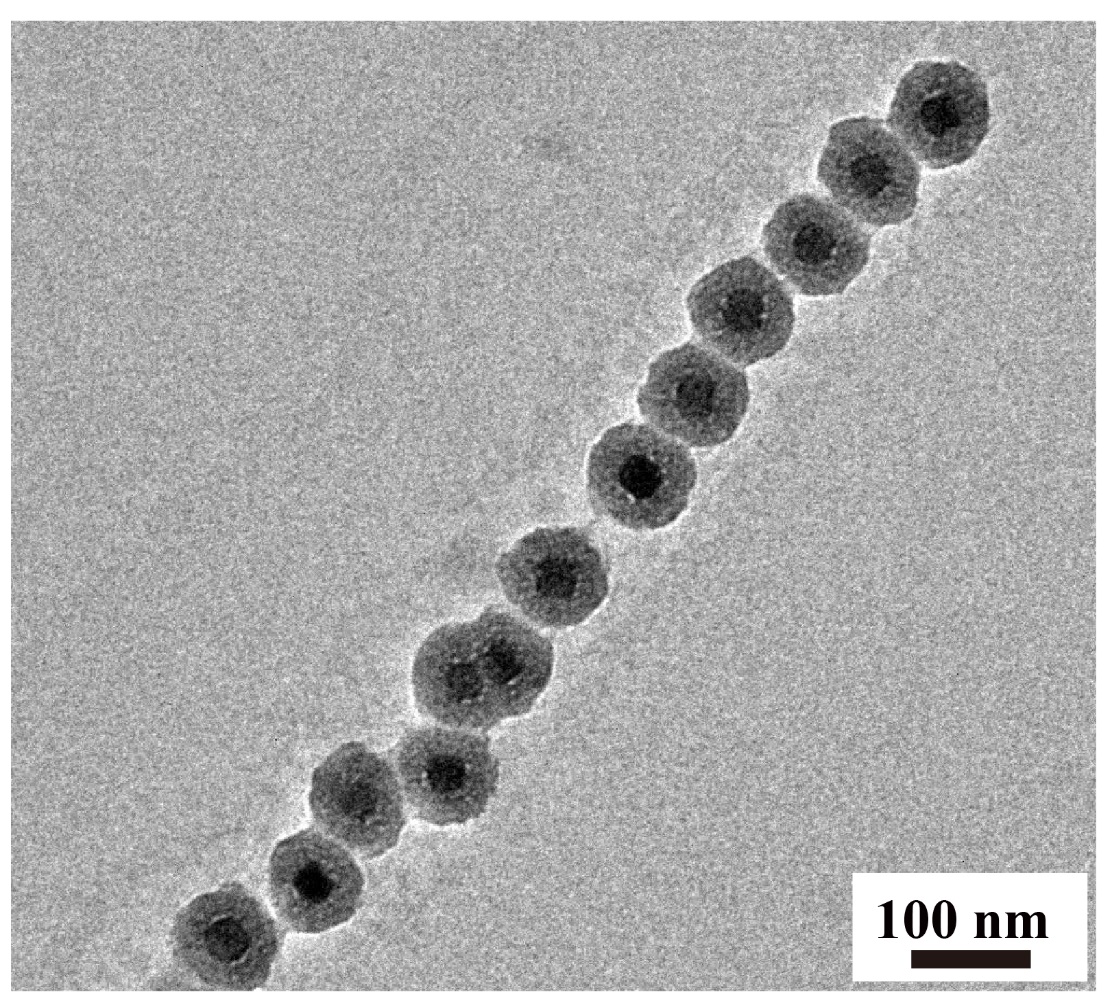


**Figure S4.** TEM images of the as-prepared UCNPTm@SiO2 nanoparticle chain mediated by F127 for 12 hours.

**
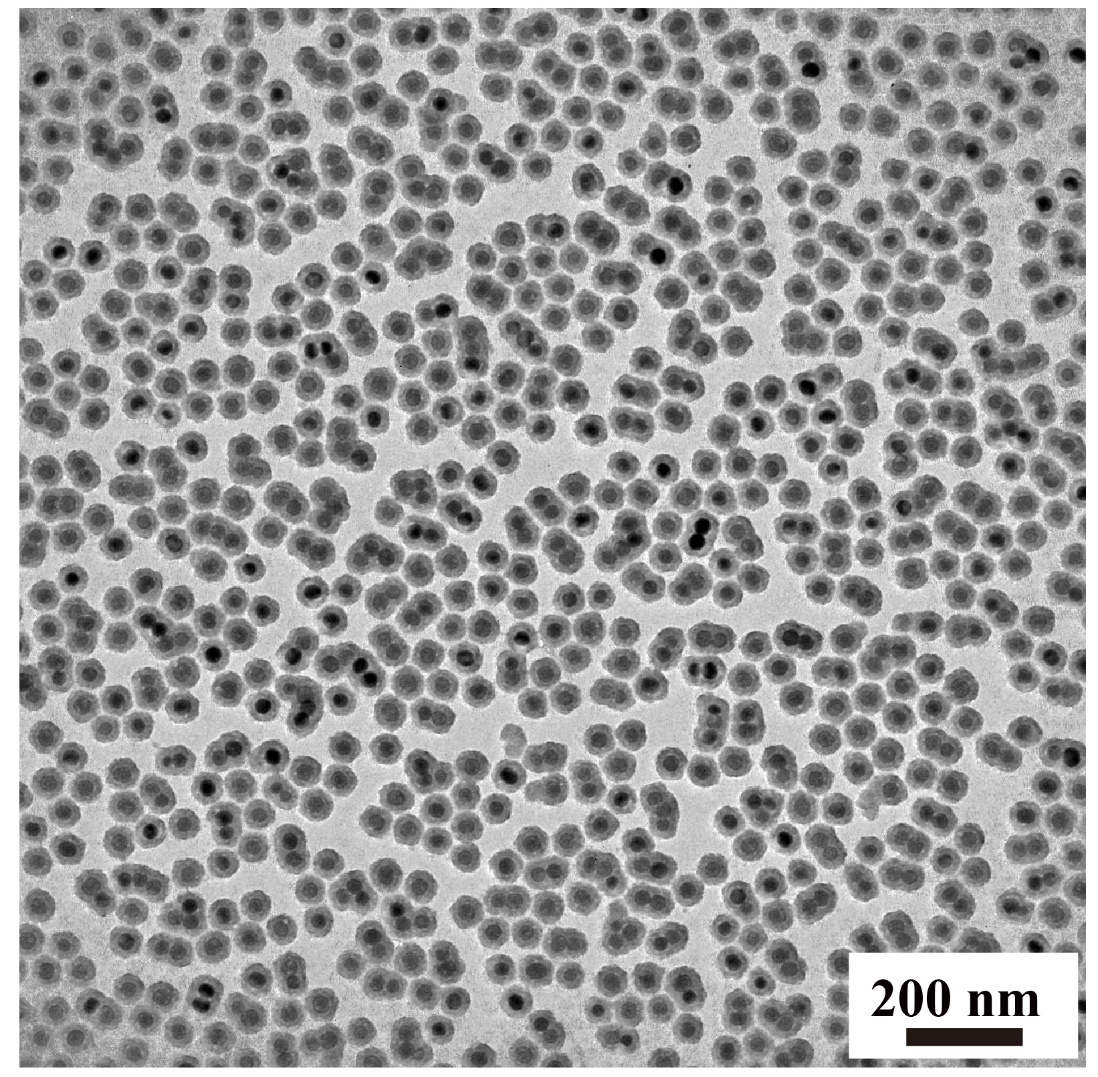
**

**Figure S5.** TEM images of the as-prepared UCNPTm@SiO2 nanoparticles incubated in water without F127.

**
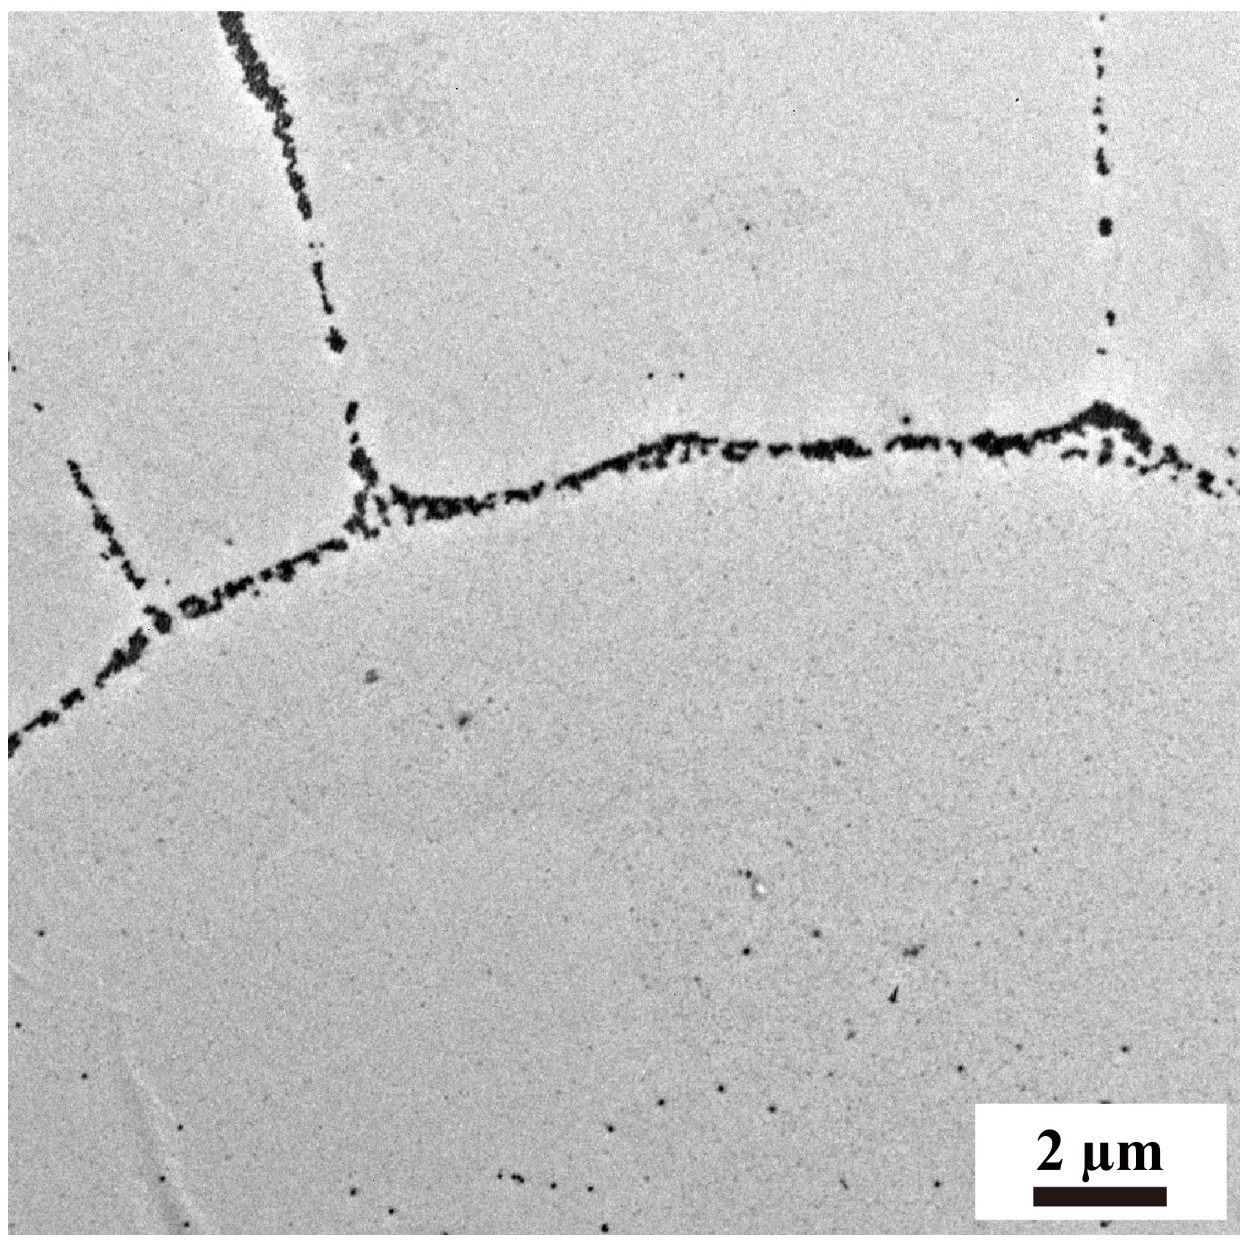
**

**Figure S6.** TEM demonstrated the existence of Y-junctions of UCNPTm@SiO2 assemblies incubated with F127 mediation for 24 hours.
